# Supplementary material for: Anti-Inflammatory Effects of Chloranthalactone B in LPS-Stimulated RAW264.7 Cells
Source: PubMed Central journal article supplement (PMC5133933; doi:10.3390/ijms17111938), 2016-11-22
Supplement: ijms-17-01938-s001.pdf [file ijms-17-01938-s001.pdf]

# Supplementary Materials: Anti-Inflammatory Effects of Chloranthalactone B in LPS-Stimulated RAW264.7 Cells

Xueqin Li, Jun Shen, Yunyao Jiang, Ting Shen, Long You, Xiaobo Sun, Xudong Xu, Weicheng Hu, Haifeng Wu and Gongcheng Wang

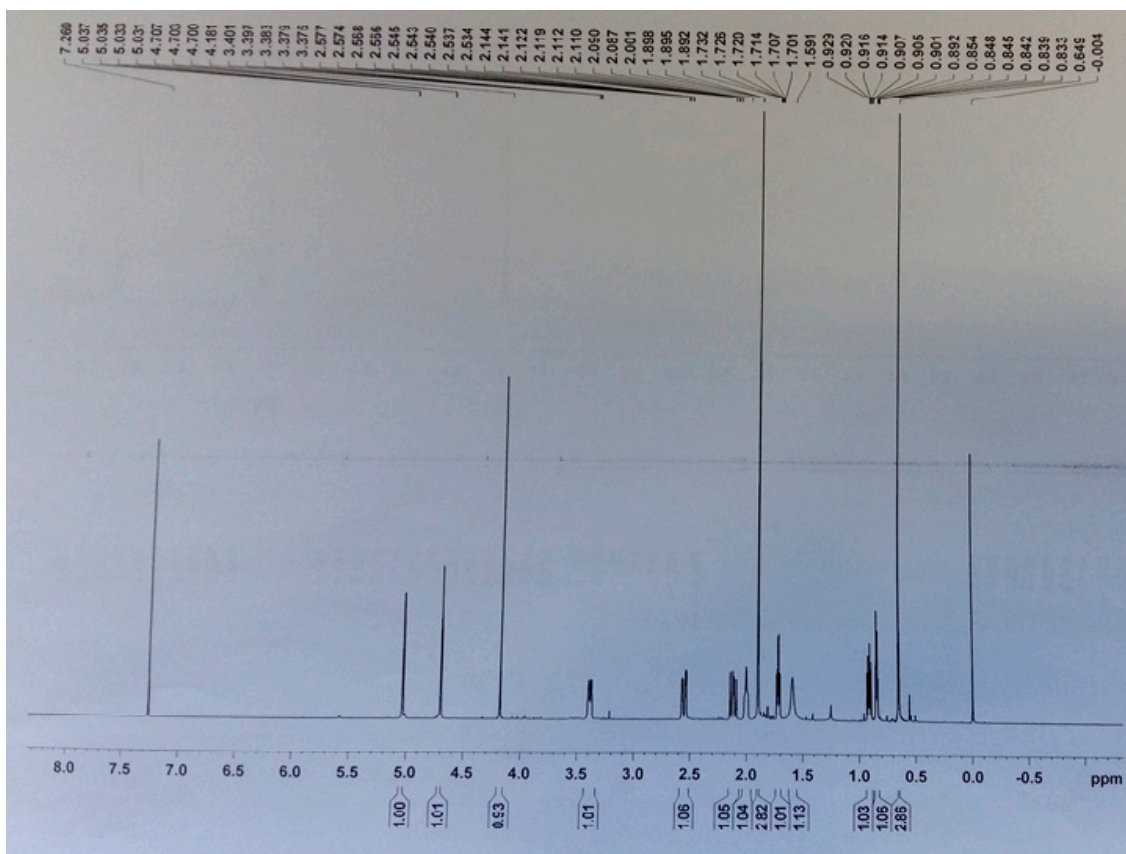

Figure S1. The <sup>1</sup>H-NMR (600 MHz, CDCl<sub>3</sub>) spectrum of chloranthalactone B (CTB).

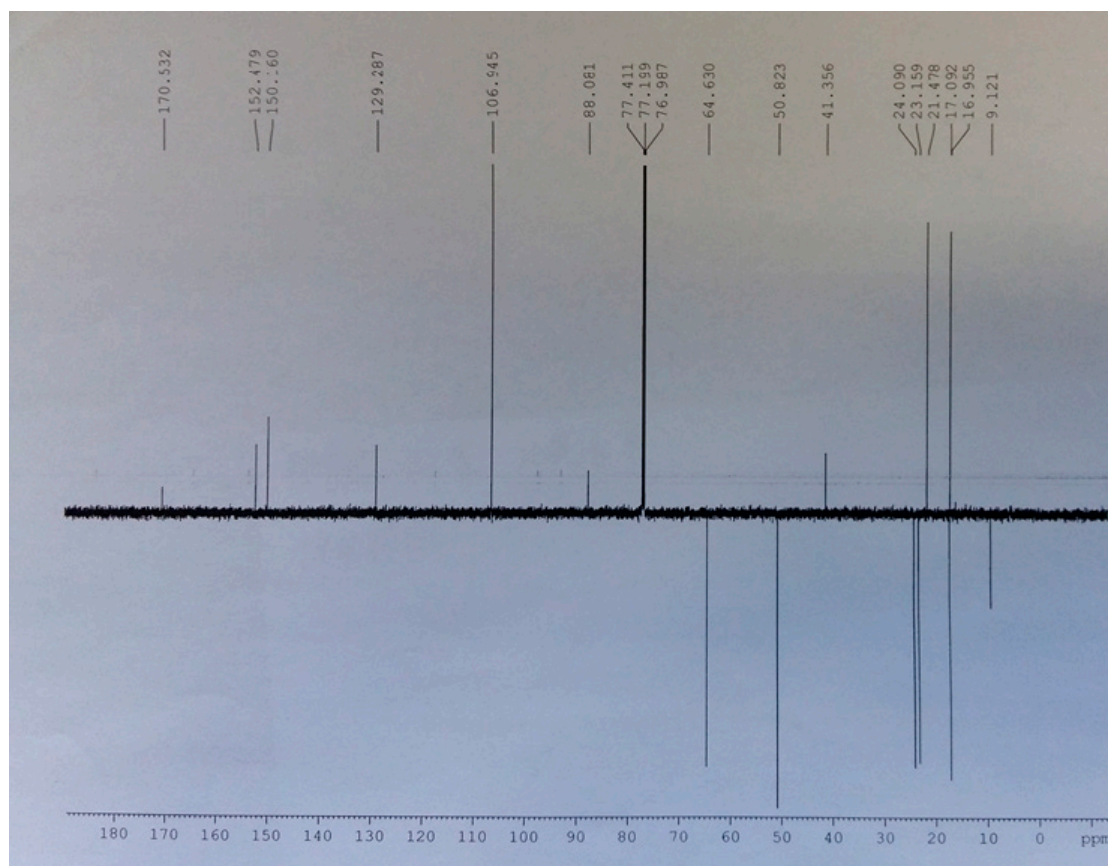

Figure S2. The <sup>13</sup>C-NMR (150 MHz, CDCl<sub>3</sub>) spectrum of CTB.
